# Supplementary material
Source: PubMed Central journal article supplement (PMC7612217)
Supplement: EMS140569-supplement-Supplemental_tables_1_8__Supplemental_Figures_1__4.pdf [file EMS140569-supplement-Supplemental_tables_1_8__Supplemental_Figures_1__4.pdf]

## Supplemental material

**Supplemental Table 1: Kaplan-Meier estimates of cumulative revision of knee second revision**

| Age group (years) | n     | Time since previous revision |                            |                            |                            |                            |                            |
|-------------------|-------|------------------------------|----------------------------|----------------------------|----------------------------|----------------------------|----------------------------|
|                   |       | 1 year                       | 3 years                    | 5 years                    | 7 years                    | 10 years                   | 13 years                   |
| <b>All cases</b>  | 3,575 | 6.29 (5.51-7.17)             | 15.85 (14.54-17.26)        | 20.66 (19.07-22.35)        | 23.03 (21.24-24.94)        | 25.74 (23.32-28.37)        | ..                         |
| <b>Females</b>    | 1,656 | 5.20 (4.19-6.44)             | 13.85 (12.07-15.86)        | 19.20 (16.94-21.73)        | 20.47 (18.04-23.18)        | 23.33 (19.80-27.36)        | 25.11 (20.47-30.59)        |
| F <55             | 396   | 4.68 (2.93-7.42)             | <i>15.37 (11.72-20.01)</i> | <i>24.33 (19.25-30.46)</i> | <i>25.11 (19.90-31.41)</i> | <i>34.05 (24.27-46.39)</i> | ..                         |
| F 55-59y          | 298   | <i>7.02 (4.53-10.80)</i>     | <i>18.71 (14.21-24.42)</i> | <i>22.96 (17.71-29.47)</i> | <i>26.36 (20.27-33.87)</i> | <i>26.36 (20.27-33.87)</i> | <i>26.36 (20.27-33.87)</i> |
| F 60-64y          | 285   | <i>4.96 (2.91-8.39)</i>      | <i>11.67 (8.12-16.64)</i>  | <i>13.01 (9.15-18.32)</i>  | <i>15.76 (10.86-22.57)</i> | <i>15.76 (10.86-22.57)</i> | <i>15.76 (10.86-22.57)</i> |
| F 65-69y          | 303   | <i>7.16 (4.68-10.89)</i>     | <i>16.30 (12.22-21.58)</i> | <i>20.31 (15.47-26.40)</i> | <i>20.31 (15.47-26.40)</i> | <i>24.10 (16.49-34.44)</i> | ..                         |
| F 70-74y          | 192   | <i>5.07 (2.67-9.53)</i>      | <i>10.01 (6.21-15.93)</i>  | <i>19.89 (13.29-29.18)</i> | <i>19.89 (13.29-29.18)</i> | <i>19.89 (13.29-29.18)</i> | ..                         |
| F 75-79y          | 110   | 0                            | <i>5.99 (2.54-13.82)</i>   | <i>11.27 (5.67-21.74)</i>  | <i>11.27 (5.67-21.74)</i>  | <i>11.27 (5.67-21.74)</i>  | ..                         |
| F 80+             | 72    | <i>1.41 (0.20-9.58)</i>      | <i>5.79 (1.86-17.24)</i>   | <i>5.79 (1.86-17.24)</i>   | <i>5.79 (1.86-17.24)</i>   | <i>5.79 (1.86-17.24)</i>   | ..                         |
| <b>Males</b>      | 1,919 | 7.22 (6.11-8.52)             | 17.55 (15.72-19.56)        | 21.86 (19.72-24.20)        | 25.15 (22.64-27.88)        | 27.79 (24.53-31.39)        | 27.79 (24.53-31.39)        |
| M <55             | 435   | 8.37 (6.05-11.52)            | <i>21.29 (17.36-25.98)</i> | <i>25.07 (20.60-30.30)</i> | <i>28.97 (23.70-35.11)</i> | <i>31.81 (24.79-40.24)</i> | <i>31.81 (24.79-40.24)</i> |
| M 55-59y          | 327   | 6.81 (4.49-10.26)            | <i>16.26 (12.25-21.42)</i> | <i>18.88 (14.36-24.60)</i> | <i>24.84 (18.70-32.56)</i> | <i>33.43 (23.74-45.73)</i> | <i>33.43 (23.74-45.73)</i> |
| M 60-64y          | 403   | 6.30 (4.27-9.25)             | <i>16.66 (12.99-21.24)</i> | <i>23.02 (18.47-28.48)</i> | <i>25.21 (20.24-31.14)</i> | <i>26.54 (21.13-33.03)</i> | <i>26.54 (21.13-33.03)</i> |
| M 65-69y          | 334   | 6.97 (4.60-10.51)            | <i>16.75 (12.73-21.87)</i> | <i>22.18 (17.25-28.26)</i> | <i>24.68 (19.27-31.29)</i> | <i>24.68 (19.27-31.29)</i> | ..                         |
| M 70-74y          | 262   | <i>6.13 (3.74-9.96)</i>      | <i>15.22 (11.09-20.71)</i> | <i>19.00 (14.04-25.44)</i> | <i>20.56 (15.03-27.76)</i> | <i>20.56 (15.03-27.76)</i> | ..                         |
| M 75-79y          | 112   | <i>9.09 (4.82-16.78)</i>     | <i>19.38 (12.15-30.10)</i> | <i>21.30 (13.54-32.57)</i> | <i>25.67 (15.71-40.25)</i> | <i>25.67 (15.71-40.25)</i> | ..                         |
| M 80+             | 46    | <i>11.53 (4.97-25.52)</i>    | <i>11.53 (4.97-25.52)</i>  | <i>11.53 (4.97-25.52)</i>  | <i>11.53 (4.97-25.52)</i>  | ..                         | ..                         |

Blue italics signify that fewer than 250 cases remained at risk at these time points.

**Supplemental Table 2: KM estimates of cumulative revision of knee third revision**

| Age group (years) | n   | Time since previous revision |                     |                     |                     |                     |
|-------------------|-----|------------------------------|---------------------|---------------------|---------------------|---------------------|
|                   |     | 1 year                       | 3 years             | 5 years             | 7 years             | 10 years            |
| <b>All cases</b>  | 574 | 7.52 (5.55-10.16)            | 20.70 (17.14-24.88) | 29.44 (24.60-34.99) | 32.14 (26.68-38.40) | ..                  |
| <b>Females</b>    | 235 | 5.99 (3.44-10.32)            | 17.91 (12.88-24.60) | 25.25 (18.38-34.12) | 28.13 (19.97-38.71) | 28.13 (19.97-38.71) |
| F <55             | 67  | 3.34 (0.84-12.69)            | 17.37 (9.37-30.91)  | 21.12 (11.58-36.71) | 21.12 (11.58-36.71) | 21.12 (11.58-36.71) |
| F 55-59y          | 53  | 4.61 (1.17-17.21)            | 19.38 (9.65-36.69)  | 37.62 (20.03-63.08) | 37.62 (20.03-63.08) | 37.62 (20.03-63.08) |
| F 60-64y          | 31  | 16.96 (6.71-39.19)           | 23.35 (10.18-48.23) | 32.93 (15.11-62.23) | 32.93 (15.11-62.23) | ..                  |
| F 65-69y          | 49  | 9.16 (3.53-22.65)            | 21.09 (11.02-38.13) | 25.73 (13.86-44.74) | 35.01 (18.05-60.66) | 35.01 (18.05-60.66) |
| F 70-74y          | 24  | 0                            | 11.46 (2.99-38.61)  | 11.46 (2.99-38.61)  | 11.46 (2.99-38.61)  | ..                  |
| F 75-79y          | 8   | 0                            | 0                   | 0                   | ..                  | ..                  |
| F 80+             | 3   | ..                           | ..                  | ..                  | ..                  | ..                  |
| <b>Males</b>      | 339 | 8.58 (5.96-12.27)            | 22.55 (17.90-28.19) | 31.86 (25.65-39.15) | 34.30 (27.55-42.17) | 36.93 (28.99-46.24) |
| M <55             | 91  | 9.26 (4.74-17.69)            | 28.59 (19.41-40.87) | 35.29 (23.88-50.05) | 39.33 (26.63-55.37) | 39.33 (26.63-55.37) |
| M 55-59y          | 55  | 15.77 (8.21-29.09)           | 26.06 (15.53-41.72) | 32.64 (20.35-49.65) | 32.64 (20.35-49.65) | ..                  |
| M 60-64y          | 73  | 8.86 (4.07-18.70)            | 21.19 (12.80-33.90) | 32.57 (20.13-49.88) | 32.57 (20.13-49.88) | 32.57 (20.13-49.88) |
| M 65-69y          | 57  | 4.07 (1.02-15.48)            | 14.65 (6.69-30.39)  | 37.30 (20.27-61.80) | 37.30 (20.27-61.80) | 37.30 (20.27-61.80) |
| M 70-74y          | 40  | 5.26 (1.34-19.44)            | 26.37 (13.94-46.45) | 26.37 (13.94-46.45) | 41.10 (18.93-73.68) | 41.10 (18.93-73.68) |
| M 75-79y          | 18  | 5.88 (0.85-34.98)            | 5.88 (0.85-34.98)   | 17.65 (4.32-57.43)  | 17.65 (4.32-57.43)  | ..                  |
| M 80+             | 5   | 0                            | 0                   | 0                   | 0                   | ..                  |

Blue italics signify that fewer than 250 cases remained at risk at these time points.

**Supplemental Table 3: KM estimates of cumulative revision of knee first revision based on primary total knees.**

| Age group (years) | n      | Time since first revision |                     |                          |                            |                            |                            |                            |
|-------------------|--------|---------------------------|---------------------|--------------------------|----------------------------|----------------------------|----------------------------|----------------------------|
|                   |        | 1 year                    | 3 years             | 5 years                  | 7 years                    | 10 years                   | 13 years                   | 15 years                   |
| <b>All cases</b>  | 24,117 | 3.99 (3.74-4.25)          | 10.30 (9.89-10.74)  | 13.46 (12.96-13.99)      | 15.77 (15.18-16.39)        | 17.98 (17.21-18.77)        | <i>20.82 (18.93-22.88)</i> |                            |
| <b>Females</b>    | 13,084 | 3.32 (3.02-3.66)          | 8.46 (7.95-9.01)    | 11.45 (10.81-12.12)      | 13.22 (12.48-14.00)        | 15.07 (14.11-16.08)        | <i>16.51 (14.97-18.18)</i> | <i>16.51 (14.97-18.18)</i> |
| F <55             | 1,768  | 3.48 (2.70-4.48)          | 9.64 (8.21-11.30)   | 14.75 (12.81-16.94)      | 18.13 (15.79-20.78)        | <i>21.87 (18.67-25.52)</i> | <i>21.87 (18.67-25.52)</i> | ..                         |
| F 55-59y          | 1,817  | 2.95 (2.25-3.88)          | 9.29 (7.91-10.91)   | 13.37 (11.60-15.39)      | 17.20 (14.96-19.74)        | <i>20.39 (17.34-23.90)</i> | <i>21.11 (17.82-24.90)</i> | ..                         |
| F 60-64y          | 2,300  | 2.89 (2.27-3.69)          | 8.67 (7.47-10.04)   | 11.70 (10.22-13.37)      | 13.48 (11.81-15.38)        | <i>14.69 (12.76-16.89)</i> | <i>19.55 (14.30-26.41)</i> | <i>19.55 (14.30-26.41)</i> |
| F 65-69y          | 2,509  | 3.91 (3.19-4.77)          | 9.20 (8.03-10.54)   | 12.17 (10.74-13.77)      | 13.34 (11.77-15.10)        | <i>15.04 (13.08-17.27)</i> | <i>15.89 (13.44-18.73)</i> | ..                         |
| F 70-74y          | 2,166  | 2.98 (2.33-3.82)          | 7.49 (6.36-8.82)    | 9.66 (8.30-11.24)        | 10.44 (8.97-12.14)         | <i>11.55 (9.79-13.61)</i>  | <i>11.55 (9.79-13.61)</i>  | ..                         |
| F 75-79y          | 1,561  | 3.35 (2.54-4.41)          | 5.64 (4.52-7.03)    | 7.05 (5.71-8.69)         | 7.50 (6.05-9.28)           | <i>8.31 (6.57-10.49)</i>   | <i>8.31 (6.57-10.49)</i>   | ..                         |
| F 80+             | 963    | 3.98 (2.87-5.50)          | 8.88 (7.02-11.19)   | <i>9.33 (7.40-11.73)</i> | <i>9.33 (7.40-11.73)</i>   | <i>9.33 (7.40-11.73)</i>   | ..                         | ..                         |
| <b>Males</b>      | 11,033 | 4.78 (4.39-5.21)          | 12.48 (11.82-13.18) | 15.85 (15.06-16.68)      | 18.80 (17.86-19.78)        | 21.42 (20.21-22.69)        | <i>25.60 (22.31-29.28)</i> | ..                         |
| M <55             | 1,506  | 5.78 (4.68-7.14)          | 17.04 (15.03-19.30) | 21.38 (19.02-23.98)      | 26.95 (24.01-30.18)        | <i>30.50 (26.86-34.51)</i> | <i>31.72 (27.51-36.40)</i> | ..                         |
| M 55-59y          | 1,553  | 4.34 (3.41-5.51)          | 14.36 (12.53-16.44) | 18.31 (16.14-20.72)      | 21.19 (18.71-23.94)        | <i>25.21 (21.75-29.10)</i> | <i>29.14 (23.85-35.29)</i> | ..                         |
| M 60-64y          | 2,222  | 4.61 (3.80-5.60)          | 12.76 (11.32-14.37) | 16.51 (14.79-18.40)      | 19.99 (17.93-22.26)        | <i>21.91 (19.46-24.61)</i> | <i>22.92 (19.89-26.33)</i> | ..                         |
| M 65-69y          | 2,238  | 4.54 (3.73-5.52)          | 11.74 (10.34-13.31) | 14.72 (13.06-16.57)      | 16.75 (14.86-18.85)        | <i>19.26 (16.87-21.95)</i> | <i>27.15 (19.14-37.65)</i> | ..                         |
| M 70-74y          | 1,810  | 5.39 (4.41-6.57)          | 11.59 (10.09-13.30) | 14.69 (12.91-16.70)      | 17.07 (14.95-19.45)        | <i>19.13 (16.42-22.22)</i> | <i>19.13 (16.42-22.22)</i> | ..                         |
| M 75-79y          | 1,133  | 3.88 (2.87-5.23)          | 8.35 (6.75-10.31)   | 11.09 (9.06-13.55)       | <i>12.78 (10.44-15.61)</i> | <i>14.86 (11.39-19.26)</i> | <i>21.95 (11.44-39.68)</i> | ..                         |
| M 80+             | 571    | 4.86 (3.33-7.06)          | 7.81 (5.71-10.63)   | <i>8.59 (6.31-11.66)</i> | <i>9.60 (6.81-13.44)</i>   | <i>11.24 (7.48-16.71)</i>  | <i>11.24 (7.48-16.71)</i>  | ..                         |

Blue italics signify that fewer than 250 cases remained at risk at these time points.

**Supplemental Table 4: KM estimates of cumulative revision of knee second revision based on primary total knees.**

| Age group (years) | n     | Time since previous revision |                            |                            |                            |                            |                            |
|-------------------|-------|------------------------------|----------------------------|----------------------------|----------------------------|----------------------------|----------------------------|
|                   |       | 1 year                       | 3 years                    | 5 years                    | 7 years                    | 10 years                   | 13 years                   |
| <b>All cases</b>  | 2,736 | 6.56 (5.66-7.60)             | 16.31 (14.81-17.94)        | 21.50 (19.65-23.49)        | 23.95 (21.86-26.20)        | <i>26.76 (23.82-29.99)</i> |                            |
| <b>Females</b>    | 1,233 | 5.40 (4.23-6.89)             | 13.85 (11.81-16.20)        | 19.30 (16.67-22.28)        | <i>20.70 (17.87-23.91)</i> | <i>24.00 (19.60-29.21)</i> | <i>27.46 (20.33-36.46)</i> |
| F <55             | 213   | <i>4.58 (2.41-8.62)</i>      | <i>13.22 (8.95-19.31)</i>  | <i>22.32 (15.99-30.66)</i> | <i>23.68 (17.03-32.38)</i> | <i>34.93 (21.23-53.88)</i> | ..                         |
| F 55-59y          | 210   | <i>7.45 (4.47-12.27)</i>     | <i>21.25 (15.58-28.63)</i> | <i>25.94 (19.24-34.43)</i> | <i>29.23 (21.68-38.69)</i> | <i>29.23 (21.68-38.69)</i> | <i>29.23 (21.68-38.69)</i> |
| F 60-64y          | 226   | <i>5.29 (2.96-9.35)</i>      | <i>12.04 (8.05-17.81)</i>  | <i>13.71 (9.31-19.94)</i>  | <i>17.21 (11.43-25.47)</i> | <i>17.21 (11.43-25.47)</i> | <i>17.21 (11.43-25.47)</i> |
| F 65-69y          | 252   | <i>7.31 (4.61-11.51)</i>     | <i>17.74 (13.12-23.74)</i> | <i>22.40 (16.92-29.33)</i> | <i>22.40 (16.92-29.33)</i> | <i>26.49 (18.13-37.71)</i> | ..                         |
| F 70-74y          | 171   | <i>5.75 (3.03-10.78)</i>     | <i>9.63 (5.79-15.79)</i>   | <i>20.12 (12.96-30.50)</i> | <i>20.12 (12.96-30.50)</i> | <i>20.12 (12.96-30.50)</i> | ..                         |
| F 75-79y          | 91    | 0                            | <i>5.88 (2.24-14.93)</i>   | <i>10.52 (4.69-22.67)</i>  | <i>10.52 (4.69-22.67)</i>  | ..                         | ..                         |
| F 80+             | 70    | <i>1.45 (0.21-9.84)</i>      | <i>5.83 (1.88-17.31)</i>   | <i>5.83 (1.88-17.31)</i>   | <i>5.83 (1.88-17.31)</i>   | <i>5.83 (1.88-17.31)</i>   | ..                         |
| <b>Males</b>      | 1,503 | 7.50 (6.23-9.01)             | 18.29 (16.20-20.62)        | 23.24 (20.75-25.99)        | <i>26.53 (23.61-29.73)</i> | <i>29.02 (25.18-33.30)</i> | <i>29.02 (25.18-33.30)</i> |
| M <55             | 281   | <i>8.30 (5.54-12.34)</i>     | <i>22.11 (17.24-28.09)</i> | <i>27.05 (21.40-33.85)</i> | <i>29.42 (23.20-36.86)</i> | <i>29.42 (23.20-36.86)</i> | <i>29.42 (23.20-36.86)</i> |
| M 55-59y          | 246   | <i>6.91 (4.29-11.04)</i>     | <i>18.68 (13.73-25.14)</i> | <i>22.29 (16.61-29.55)</i> | <i>31.10 (22.88-41.38)</i> | <i>43.13 (30.11-58.90)</i> | ..                         |
| M 60-64y          | 322   | 7.88 (5.35-11.53)            | <i>17.34 (13.26-22.51)</i> | <i>25.14 (19.82-31.57)</i> | <i>26.27 (20.67-33.05)</i> | <i>26.27 (20.67-33.05)</i> | <i>26.27 (20.67-33.05)</i> |
| M 65-69y          | 279   | <i>7.47 (4.83-11.47)</i>     | <i>18.48 (13.94-24.27)</i> | <i>23.45 (18.05-30.14)</i> | <i>26.37 (20.39-33.70)</i> | <i>26.37 (20.39-33.70)</i> | ..                         |
| M 70-74y          | 230   | <i>6.05 (3.56-10.20)</i>     | <i>16.48 (11.91-22.57)</i> | <i>20.20 (14.72-27.37)</i> | <i>22.25 (15.92-30.59)</i> | <i>22.25 (15.92-30.59)</i> | ..                         |
| M 75-79y          | 103   | <i>7.85 (3.81-15.81)</i>     | <i>15.52 (8.99-26.05)</i>  | <i>17.53 (10.38-28.76)</i> | <i>22.11 (12.52-37.31)</i> | <i>22.11 (12.52-37.31)</i> | ..                         |
| M 80+             | 42    | <i>10.14 (3.93-24.80)</i>    | <i>10.14 (3.93-24.80)</i>  | <i>10.14 (3.93-24.80)</i>  | <i>10.14 (3.93-24.80)</i>  | ..                         | ..                         |

Blue italics signify that fewer than 250 cases remained at risk at these time points.

**Supplemental Table 5: KM estimates of cumulative revision of knee third revision based on primary total knees.**

| Age group (years) | n   | Time since previous revision |                            |                            |                            |                            |
|-------------------|-----|------------------------------|----------------------------|----------------------------|----------------------------|----------------------------|
|                   |     | 1 year                       | 3 years                    | 5 years                    | 7 years                    | 10 years                   |
| <b>All cases</b>  | 453 | 8.76 (6.39-11.95)            | <i>22.54 (18.40-27.44)</i> | <i>31.75 (26.19-38.15)</i> | <i>35.45 (28.92-42.95)</i> |                            |
| <b>Females</b>    | 176 | <i>6.61 (3.61-11.96)</i>     | <i>21.00 (14.81-29.31)</i> | <i>29.39 (20.92-40.31)</i> | <i>33.54 (23.06-47.11)</i> | ..                         |
| F <55             | 35  | <i>3.13 (0.45-20.18)</i>     | <i>27.62 (14.01-49.98)</i> | <i>34.86 (18.33-59.65)</i> | ..                         | ..                         |
| F 55-59y          | 40  | <i>2.94 (0.42-19.10)</i>     | <i>23.87 (11.34-46.09)</i> | <i>48.09 (22.00-82.28)</i> | <i>48.09 (22.00-82.28)</i> | ..                         |
| F 60-64y          | 26  | <i>19.45 (7.75-44.00)</i>    | <i>26.77 (11.79-53.89)</i> | <i>37.23 (17.41-67.84)</i> | <i>37.23 (17.41-67.84)</i> | ..                         |
| F 65-69y          | 45  | <i>9.94 (3.84-24.42)</i>     | <i>19.72 (9.80-37.36)</i>  | <i>25.07 (12.84-45.45)</i> | <i>35.77 (17.45-64.03)</i> | ..                         |
| F 70-74y          | 21  | 0                            | <i>12.50 (3.28-41.40)</i>  | <i>12.50 (3.28-41.40)</i>  | <i>12.50 (3.28-41.40)</i>  | ..                         |
| F 75-79y          | 6   | 0                            | 0                          | 0                          | ..                         | ..                         |
| F 80+             | 3   |                              |                            | ..                         | ..                         | ..                         |
| <b>Males</b>      | 277 | <i>10.14 (7.01-14.54)</i>    | <i>23.51 (18.30-29.91)</i> | <i>33.07 (26.14-41.26)</i> | <i>36.43 (28.61-45.60)</i> | <i>36.43 (28.61-45.60)</i> |
| M <55             | 61  | <i>13.74 (7.11-25.62)</i>    | <i>29.69 (18.74-45.01)</i> | <i>34.09 (21.56-51.11)</i> | <i>40.08 (25.11-59.63)</i> | <i>40.08 (25.11-59.63)</i> |
| M 55-59y          | 48  | <i>18.30 (9.59-33.32)</i>    | <i>28.19 (16.38-45.82)</i> | <i>36.41 (22.30-55.63)</i> | <i>36.41 (22.30-55.63)</i> | ..                         |
| M 60-64y          | 61  | <i>10.78 (4.98-22.49)</i>    | <i>23.86 (14.19-38.46)</i> | <i>39.43 (23.82-60.31)</i> | <i>39.43 (23.82-60.31)</i> | <i>39.43 (23.82-60.31)</i> |
| M 65-69y          | 52  | <i>4.41 (1.11-16.66)</i>     | <i>15.79 (7.23-32.51)</i>  | <i>33.49 (17.50-57.87)</i> | <i>33.49 (17.50-57.87)</i> | ..                         |
| M 70-74y          | 37  | <i>5.71 (1.46-20.97)</i>     | <i>28.04 (14.94-48.80)</i> | <i>28.04 (14.94-48.80)</i> | <i>46.03 (20.44-81.06)</i> | ..                         |
| M 75-79y          | 14  | 0                            | 0                          | <i>14.29 (2.14-66.59)</i>  | <i>14.29 (2.14-66.59)</i>  | ..                         |
| M 80+             | 4   | 0                            | 0                          | ..                         | ..                         | ..                         |

Blue italics signify that fewer than 250 cases remained at risk at these time points.

**Supplemental Table 6: KM estimates of cumulative revision of knee first revision based on primary unicondylar knees.**

| Age group (years) | n     | Time since first revision |                          |                           |                            |                            |                            |
|-------------------|-------|---------------------------|--------------------------|---------------------------|----------------------------|----------------------------|----------------------------|
|                   |       | 1 year                    | 3 years                  | 5 years                   | 7 years                    | 10 years                   | 13 years                   |
| <b>All cases</b>  | 7,429 | 2.77 (2.41-3.19)          | 7.92 (7.27-8.62)         | 10.97 (10.16-11.84)       | 12.96 (12.02-13.97)        | 15.58 (14.33-16.94)        | <i>18.25 (15.68-21.20)</i> |
| <b>Females</b>    | 3,808 | 2.36 (1.91-2.91)          | 6.84 (6.01-7.79)         | 10.01 (8.93-11.21)        | 11.97 (10.72-13.37)        | 14.59 (12.90-16.47)        | <i>17.23 (13.43-21.97)</i> |
| F <55             | 1,117 | 3.24 (2.32-4.50)          | 9.27 (7.56-11.33)        | 14.96 (12.61-17.71)       | <i>18.46 (15.63-21.73)</i> | <i>22.96 (19.00-27.60)</i> | <i>29.38 (18.75-44.16)</i> |
| F 55-59y          | 726   | 2.22 (1.34-3.65)          | 9.02 (6.95-11.66)        | 10.50 (8.20-13.41)        | <i>12.91 (10.15-16.35)</i> | <i>15.53 (12.00-19.97)</i> | <i>15.53 (12.00-19.97)</i> |
| F 60-64y          | 682   | 1.71 (0.95-3.06)          | 5.50 (3.89-7.76)         | 8.09 (5.98-10.91)         | <i>9.13 (6.80-12.21)</i>   | <i>10.89 (7.78-15.13)</i>  | <i>10.89 (7.78-15.13)</i>  |
| F 65-69y          | 549   | 2.78 (1.66-4.65)          | 5.17 (3.49-7.63)         | <i>8.53 (6.10-11.86)</i>  | <i>9.86 (7.13-13.56)</i>   | <i>12.91 (8.99-18.35)</i>  | <i>12.91 (8.99-18.35)</i>  |
| F 70-74y          | 374   | 1.68 (0.76-3.70)          | <i>3.37 (1.87-6.04)</i>  | <i>5.08 (3.06-8.37)</i>   | <i>5.83 (3.52-9.58)</i>    | <i>6.99 (4.12-11.75)</i>   | <i>12.80 (5.08-30.26)</i>  |
| F 75-79y          | 241   | <i>1.74 (0.66-4.58)</i>   | <i>4.78 (2.59-8.75)</i>  | <i>6.31 (3.57-11.01)</i>  | <i>7.30 (4.19-12.57)</i>   | <i>7.30 (4.19-12.57)</i>   | <i>7.30 (4.19-12.57)</i>   |
| F 80+             | 119   | 0                         | <i>1.05 (0.15-7.24)</i>  | <i>1.05 (0.15-7.24)</i>   | <i>1.05 (0.15-7.24)</i>    | <i>1.05 (0.15-7.24)</i>    | ..                         |
| <b>Males</b>      | 3,621 | 3.21 (2.67-3.86)          | 9.05 (8.07-10.14)        | 11.97 (10.79-13.27)       | 14.00 (12.63-15.50)        | 16.64 (14.81-18.65)        | <i>19.21 (16.24-22.64)</i> |
| M <55             | 930   | 4.45 (3.27-6.04)          | 12.74 (10.57-15.31)      | 15.86 (13.33-18.81)       | <i>18.12 (15.21-21.52)</i> | <i>22.17 (18.02-27.10)</i> | <i>25.05 (18.78-32.94)</i> |
| M 55-59y          | 707   | 2.05 (1.22-3.43)          | 7.36 (5.51-9.78)         | 12.10 (9.57-15.24)        | <i>13.64 (10.81-17.13)</i> | <i>17.24 (13.45-21.95)</i> | <i>23.20 (15.44-34.00)</i> |
| M 60-64y          | 749   | 4.31 (3.03-6.12)          | 8.44 (6.51-10.90)        | 11.57 (9.16-14.57)        | <i>14.50 (11.59-18.06)</i> | <i>15.65 (12.44-19.58)</i> | <i>15.65 (12.44-19.58)</i> |
| M 65-69y          | 585   | 2.84 (1.75-4.60)          | 9.25 (6.94-12.28)        | <i>10.45 (7.94-13.70)</i> | <i>11.40 (8.65-14.95)</i>  | <i>14.97 (10.56-21.01)</i> | <i>17.34 (11.64-25.40)</i> |
| M 70-74y          | 391   | 1.88 (0.90-3.91)          | <i>6.82 (4.53-10.22)</i> | <i>8.97 (6.19-12.91)</i>  | <i>11.52 (8.07-16.30)</i>  | <i>11.52 (8.07-16.30)</i>  | <i>11.52 (8.07-16.30)</i>  |
| M 75-79y          | 186   | <i>2.22 (0.84-5.81)</i>   | <i>4.94 (2.49-9.71)</i>  | <i>4.94 (2.49-9.71)</i>   | <i>6.84 (3.29-13.94)</i>   | <i>6.84 (3.29-13.94)</i>   | <i>6.84 (3.29-13.94)</i>   |
| M 80+             | 73    | 0                         | <i>5.53 (1.78-16.48)</i> | <i>8.58 (3.17-22.09)</i>  | <i>8.58 (3.17-22.09)</i>   | <i>8.58 (3.17-22.09)</i>   | ..                         |

Blue italics signify that fewer than 250 cases remained at risk at these time points.

**Supplemental Table 7: KM estimates of cumulative revision of knee second revision based on primary unicondylar knees.**

| Age group (years) | n   | Time since previous revision |                            |                            |                            |                            |                            |
|-------------------|-----|------------------------------|----------------------------|----------------------------|----------------------------|----------------------------|----------------------------|
|                   |     | 1 year                       | 3 years                    | 5 years                    | 7 years                    | 10 years                   | 13 years                   |
| <b>All cases</b>  | 719 | 5.87 (4.32-7.96)             | 14.71 (12.00-17.95)        | <i>17.93 (14.83-21.59)</i> | <i>20.38 (16.87-24.50)</i> | <i>23.16 (18.72-28.46)</i> |                            |
| <b>Females</b>    | 334 | 5.23 (3.23-8.39)             | <i>13.82 (10.11-18.75)</i> | <i>17.97 (13.50-23.71)</i> | <i>19.01 (14.25-25.12)</i> | <i>21.26 (15.33-29.06)</i> | ..                         |
| F <55             | 145 | <i>4.53 (2.06-9.80)</i>      | <i>17.87 (11.69-26.80)</i> | <i>25.67 (17.60-36.53)</i> | <i>25.67 (17.60-36.53)</i> | <i>32.43 (19.78-50.20)</i> | ..                         |
| F 55-59y          | 71  | <i>7.45 (3.17-17.00)</i>     | <i>12.75 (6.55-24.02)</i>  | <i>16.96 (9.40-29.51)</i>  | <i>21.11 (11.62-36.57)</i> | <i>21.11 (11.62-36.57)</i> | ..                         |
| F 60-64y          | 46  | <i>4.84 (1.23-18.07)</i>     | <i>13.89 (5.95-30.53)</i>  | <i>13.89 (5.95-30.53)</i>  | <i>13.89 (5.95-30.53)</i>  | <i>13.89 (5.95-30.53)</i>  | ..                         |
| F 65-69y          | 40  | <i>8.51 (2.82-24.13)</i>     | <i>8.51 (2.82-24.13)</i>   | <i>8.51 (2.82-24.13)</i>   | <i>8.51 (2.82-24.13)</i>   | ..                         | ..                         |
| F 70-74y          | 18  | 0                            | <i>9.09 (1.33-49.19)</i>   | <i>9.09 (1.33-49.19)</i>   | <i>9.09 (1.33-49.19)</i>   | <i>9.09 (1.33-49.19)</i>   | ..                         |
| F 75-79y          | 13  | 0                            | 0                          | 0                          | 0                          | 0                          | ..                         |
| F 80+             | 1   |                              | ..                         | ..                         | ..                         | ..                         | ..                         |
| <b>Males</b>      | 385 | 6.43 (4.32-9.53)             | <i>15.48 (11.84-20.11)</i> | <i>17.85 (13.84-22.87)</i> | <i>21.43 (16.68-27.31)</i> | <i>24.70 (18.62-32.33)</i> | <i>24.70 (18.62-32.33)</i> |
| M <55             | 132 | <i>9.14 (5.16-15.93)</i>     | <i>21.66 (14.85-30.97)</i> | <i>23.19 (16.01-32.90)</i> | <i>30.93 (21.16-43.80)</i> | <i>40.80 (23.82-63.59)</i> | ..                         |
| M 55-59y          | 77  | <i>6.79 (2.88-15.55)</i>     | <i>10.06 (4.90-20.03)</i>  |
| M 60-64y          | 78  | 0                            | <i>13.89 (7.18-25.93)</i>  | <i>15.89 (8.57-28.41)</i>  | <i>21.00 (12.04-35.14)</i> | <i>25.65 (14.62-42.62)</i> | ..                         |
| M 65-69y          | 54  | <i>4.20 (1.06-15.87)</i>     | <i>6.72 (2.20-19.58)</i>   | <i>15.17 (6.22-34.39)</i>  | <i>15.17 (6.22-34.39)</i>  | <i>15.17 (6.22-34.39)</i>  | ..                         |
| M 70-74y          | 31  | <i>6.91 (1.77-24.95)</i>     | <i>6.91 (1.77-24.95)</i>   | <i>11.57 (3.82-32.18)</i>  | <i>11.57 (3.82-32.18)</i>  | <i>11.57 (3.82-32.18)</i>  | ..                         |
| M 75-79y          | 9   | <i>22.22 (6.07-63.52)</i>    | ..                         | ..                         | ..                         | ..                         | ..                         |

Blue italics signify that fewer than 250 cases remained at risk at these time points.

**Supplemental table 8: Number of revisions by reason for revision for 1st revision and 2nd revision**

| Reason for revision            | 1st revision  |                                  | 2nd revision                       |
|--------------------------------|---------------|----------------------------------|------------------------------------|
|                                | N (%)         | Subsequently re-revised<br>N (%) | N of indicated reason for revision |
| Aseptic loosening / Lysis      | 9,010 (27.1%) | 841 (9.3%)                       | 887                                |
| Infection                      | 6,310 (19.0%) | 1,012 (16.0%)                    | 1,248                              |
| Pain                           | 5,452 (16.4%) | 585 (10.7%)                      | 389                                |
| Instability                    | 4,658 (14.0%) | 492 (10.6%)                      | 635                                |
| Malalignment                   | 2,488 (7.5%)  | 218 (8.8%)                       | 219                                |
| Implant wear                   | 2,005 (6.0%)  | 184 (9.2%)                       | 135                                |
| Dislocation/subluxation        | 1,212 (3.6%)  | 178 (14.7%)                      | 155                                |
| Periprosthetic fracture        | 1,103 (3.3%)  | 76 (6.9%)                        | 72                                 |
| Other indication               | 3,814 (11.5%) | 358 (9.4%)                       | 271                                |
| Stiffness*                     | 2,122 (6.4%)  | 224 (10.6%)                      | 241                                |
| Progressive arthritis remains* | 4,696 (15.0%) | 221 (4.7%)                       | 110                                |

NB: 4 of the 33,292 procedures were missing a reason for revision, so percentages are calculated from N=33,288 rather than N=33,292

\*Stiffness as a reason for revision was not recorded in Minimum Data Set v1 and as such was only a potential reason for revision among a total of 33,262 revisions as opposed to 33,288 revisions for the other reasons.

\*Progressive arthritis remains as a reason for revision was not recorded in Minimum Data Set v1 or v2 and as such was only a potential reason for revision among a total of 31,319 revisions as opposed to 33,288 revisions for the other reasons.



**Supplemental Figure 1: Kaplan-Meier estimates of cumulative revision in those with linked primary total knee replacements by first revision, second revision and third revision**

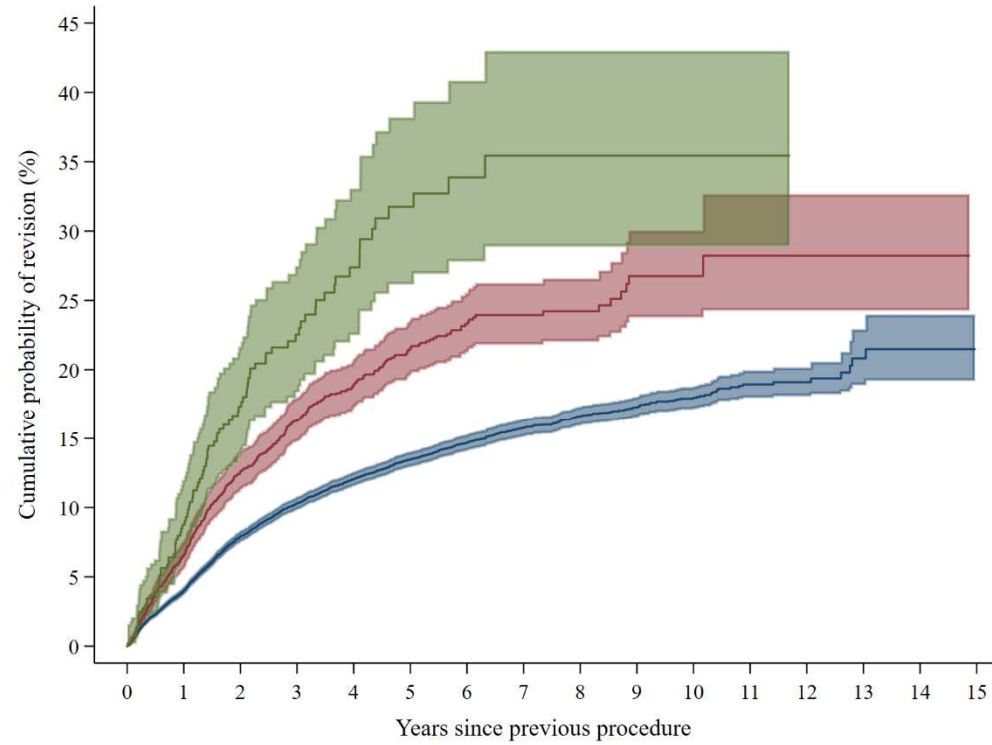

Key, with N of subsequent revision:

- First revision (N=2736)
- Second revision (N=453)
- Third revision (N=97)

Numbers at risk

|       |       |       |       |       |      |      |      |      |      |      |     |     |     |    |   |
|-------|-------|-------|-------|-------|------|------|------|------|------|------|-----|-----|-----|----|---|
| 24117 | 20136 | 16511 | 13410 | 10743 | 8487 | 6582 | 4754 | 3395 | 2232 | 1326 | 676 | 309 | 123 | 25 | 1 |
| 2736  | 2165  | 1713  | 1342  | 1019  | 720  | 491  | 319  | 206  | 121  | 57   | 28  | 13  | 5   | 1  | 0 |
| 453   | 339   | 242   | 163   | 110   | 72   | 47   | 26   | 15   | 10   | 3    | 1   | 0   | 0   | 0  | 0 |

Note: Populations not mutually exclusive; second and third revision are a subset of the first revision population

**Supplemental Figure 2: Kaplan-Meier estimates of cumulative probability of third revision by time between first revision and second revision, in those with linked total primary knee replacements**

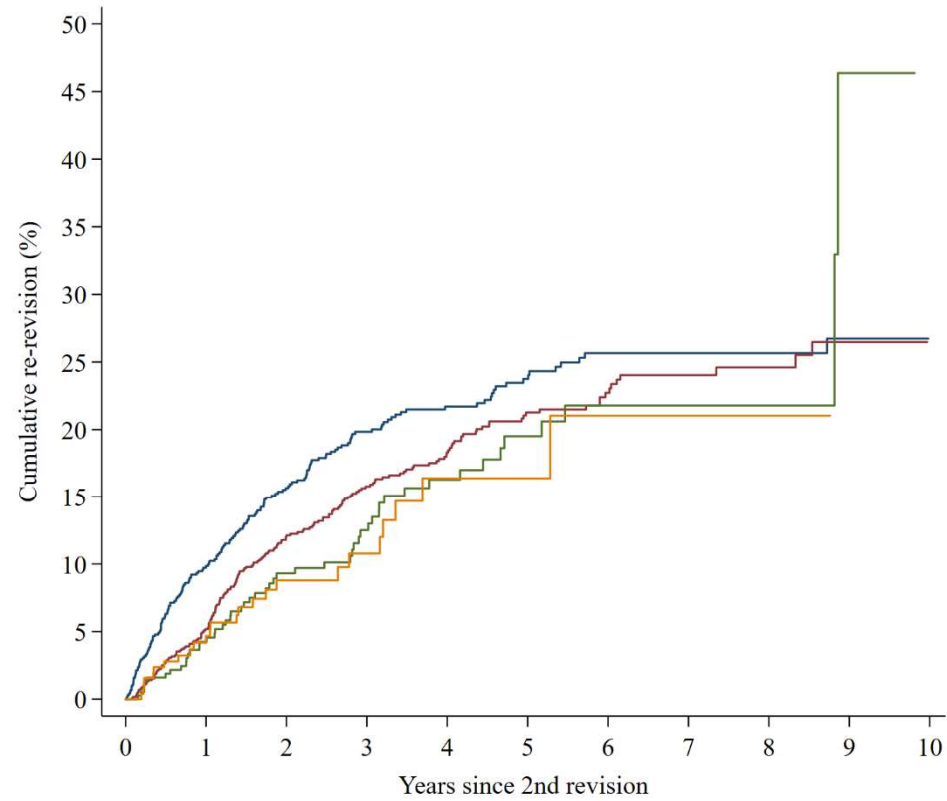

Key: Time between 1st and 2nd revisions

- <1 year
- 1 to 3 years
- 3 to 5 years
- ≥5 years

Numbers at risk

|      |     |     |     |     |     |     |     |    |    |    |
|------|-----|-----|-----|-----|-----|-----|-----|----|----|----|
| 904  | 709 | 586 | 465 | 359 | 265 | 198 | 126 | 96 | 60 | 36 |
| 1162 | 953 | 766 | 624 | 496 | 359 | 238 | 161 | 95 | 57 | 21 |
| 394  | 311 | 237 | 176 | 124 | 77  | 50  | 30  | 14 | 4  | 0  |
| 276  | 192 | 124 | 77  | 40  | 19  | 5   | 2   | 1  | 0  | 0  |

**Supplemental Figure 3: Kaplan-Meier estimates of cumulative revision in those with linked primary unicondylar knee replacements by first revision, second revision and third revision**

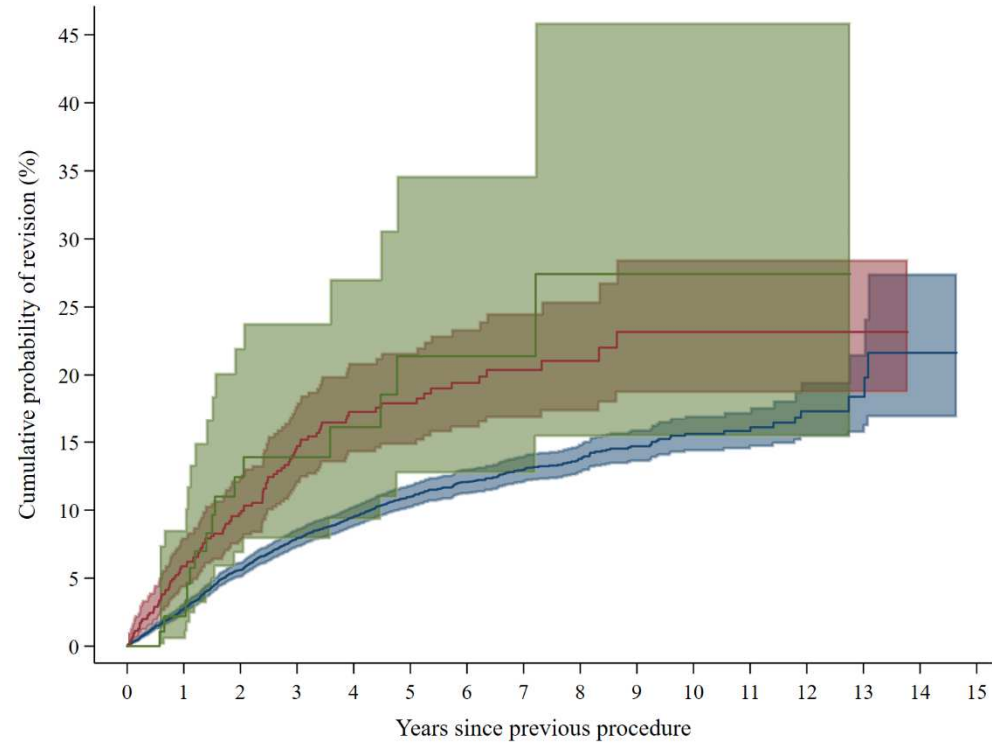

Key, with N of subsequent revision:

- First revision (N=719)
- Second revision (N=105)
- Third revision (N=15)

Numbers at risk

|      |      |      |      |      |      |      |      |      |     |     |     |     |    |    |   |
|------|------|------|------|------|------|------|------|------|-----|-----|-----|-----|----|----|---|
| 7423 | 6387 | 5383 | 4510 | 3723 | 3026 | 2447 | 1820 | 1345 | 900 | 554 | 314 | 162 | 59 | 12 | 0 |
| 719  | 577  | 465  | 365  | 285  | 235  | 184  | 132  | 91   | 53  | 37  | 19  | 6   | 1  | 0  | 0 |
| 105  | 83   | 61   | 47   | 37   | 28   | 21   | 14   | 11   | 9   | 5   | 4   | 2   | 0  | 0  | 0 |

Note: Populations not mutually exclusive; second and third revision are a subset of the first revision population

**Supplemental Figure 4: Kaplan-Meier estimates of cumulative probability of third revision by time between first revision and second revision, in those with linked unicondylar primary knee replacements**

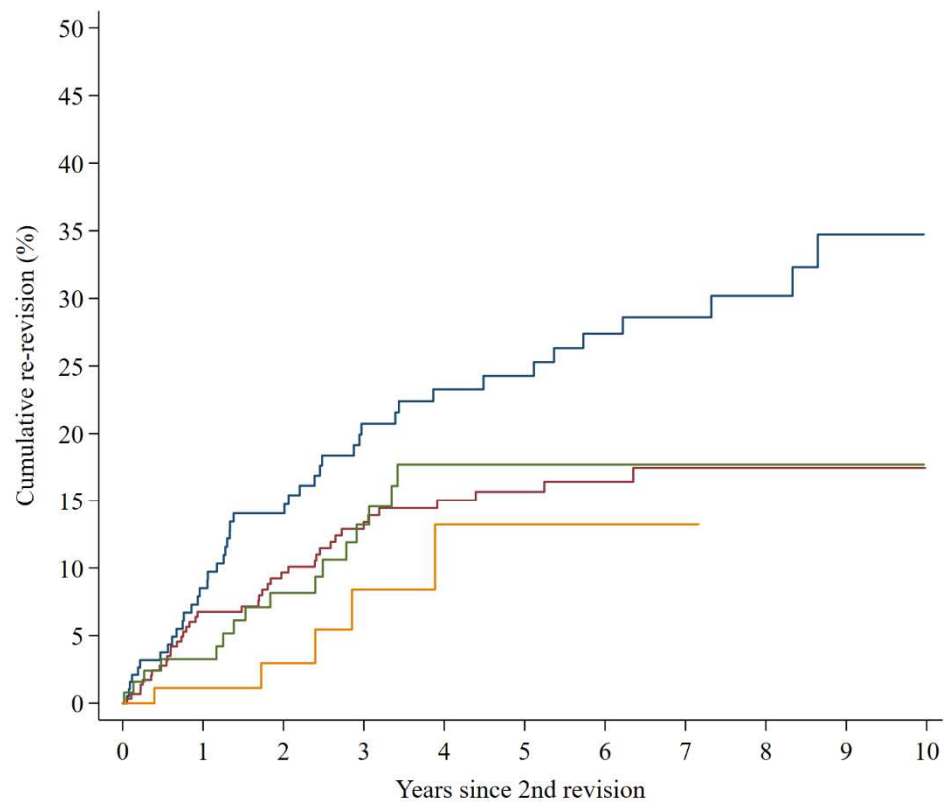

Key: Time between 1st and 2nd revisions

- <1 year
- 1 to 3 years
- 3 to 5 years
- ≥5 years

Numbers at risk

|     |     |     |     |     |     |    |    |    |    |    |
|-----|-----|-----|-----|-----|-----|----|----|----|----|----|
| 194 | 151 | 126 | 100 | 86  | 75  | 63 | 47 | 37 | 20 | 14 |
| 298 | 248 | 212 | 170 | 140 | 120 | 91 | 67 | 45 | 29 | 22 |
| 127 | 104 | 82  | 65  | 41  | 32  | 26 | 17 | 9  | 4  | 1  |
| 100 | 74  | 45  | 30  | 18  | 8   | 4  | 1  | 0  | 0  | 0  |
